# Supplementary material for: Design and synthesis of a nickel–chromium alloy catalyst for hydrogen generation from hydrazine monohydrate
Source: Royal Society of Chemistry journal article supplement (doi:10.1039/d4ta05049e), 2024-01-01
Supplement: d4ta05049e1.pdf [file d4ta05049e1.pdf]

## **Supplementary Material**

### **Design and Synthesis of Nickel-Chromium Alloy Catalyst for Hydrogen Generation from Hydrazine Monohydrate**

Jing He, Yuping Qiu, Sihuan Qin and Ping Wang\*

School of Materials Science and Engineering, South China University of Technology,

Guangzhou 510641, P.R. China

\*Corresponding author.

E-mails: mspwang@scut.edu.cn (P. Wang)

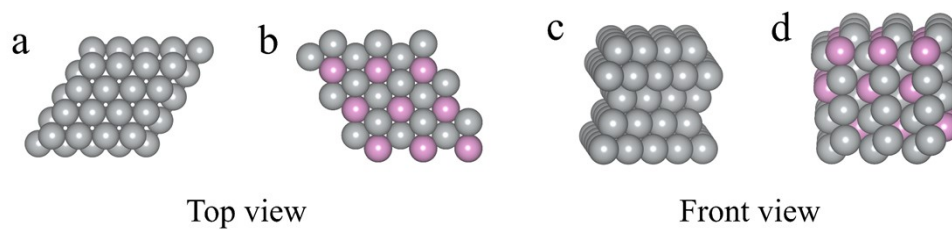

**Figure S1.** Top and front views of the modeled (a, c) Ni (111) and (b, d) Ni-Cr (111) surfaces. The gray and pink balls denote Ni and Cr atoms, respectively.

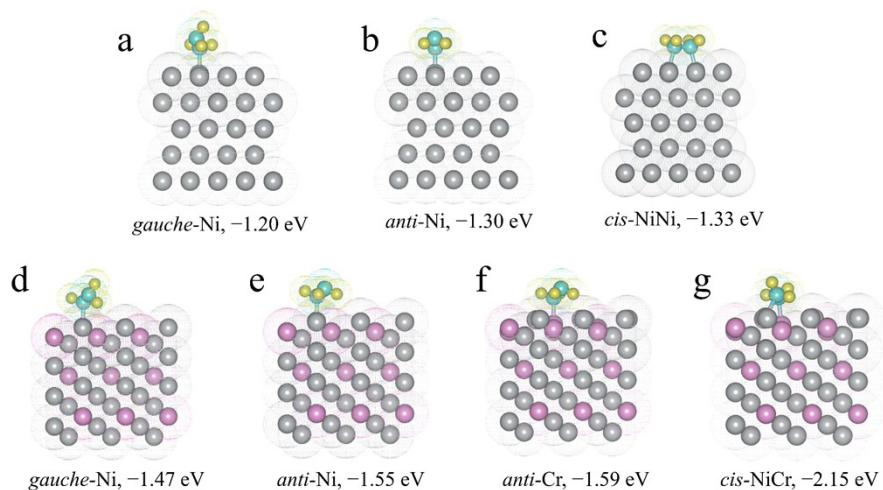

**Figure S2.** Computed adsorption conformations of  $\text{N}_2\text{H}_4$  on (a-c) Ni (111) and (d-g)  $\text{Ni}_3\text{Cr}$  (111) surfaces and the corresponding adsorption energies.

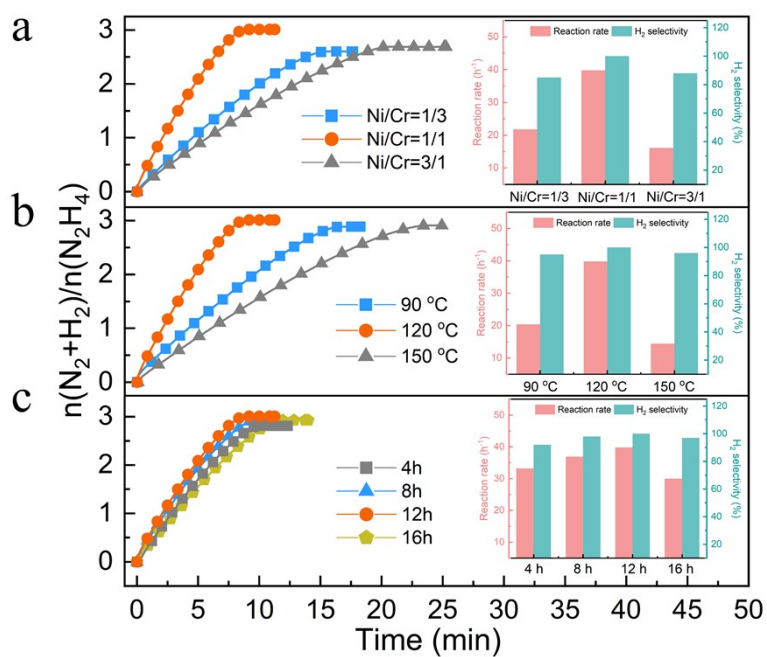

**Figure S3.** Effect of hydrothermal conditions on the catalytic properties of the samples for  $\text{N}_2\text{H}_4 \cdot \text{H}_2\text{O}$  decomposition. (a) Ni/Cr feeding ratio; (b) reaction temperature; (c) reaction time. Insets show the reaction rate and  $\text{H}_2$  selectivity of the samples prepared under different conditions.

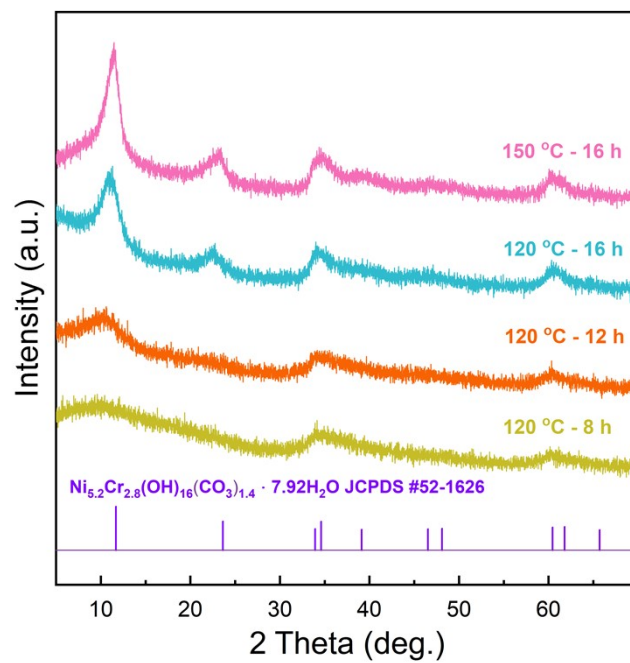

**Figure S4.** XRD patterns of the hydrothermal samples that were prepared under different conditions, with the Ni/Cr feeding ratio fixed at 1:1.

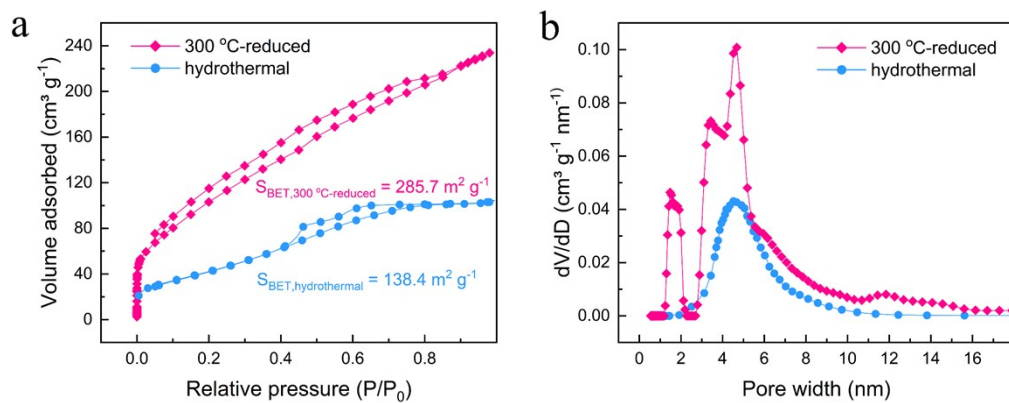

**Figure S5.** (a) N<sub>2</sub> adsorption-desorption isotherms and (b) the pore size distributions of the hydrothermal and 300 °C-reduced samples.

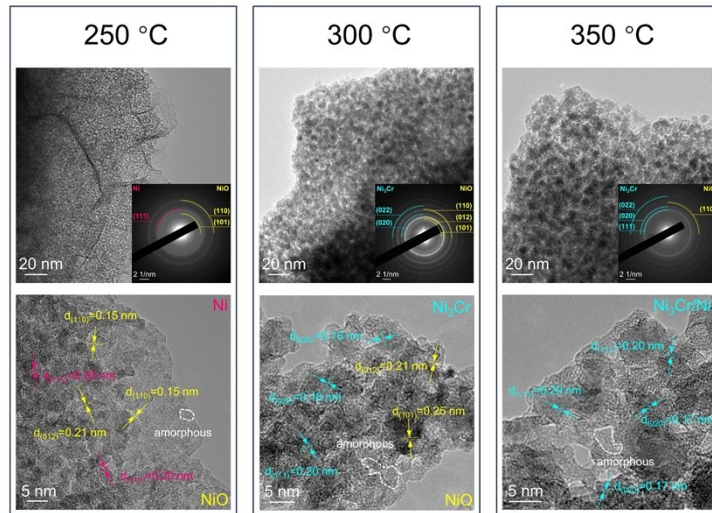

**Figure S6.** TEM and HRTEM images and SAED patterns (insets) of the reduced samples at different temperatures.

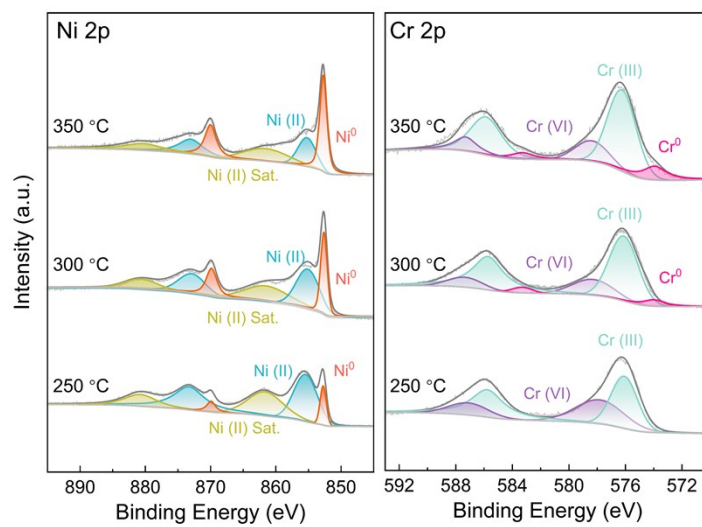

**Figure S7.** XPS results of the reduced samples at different temperatures in the Ni 2p and Cr 2p regions.



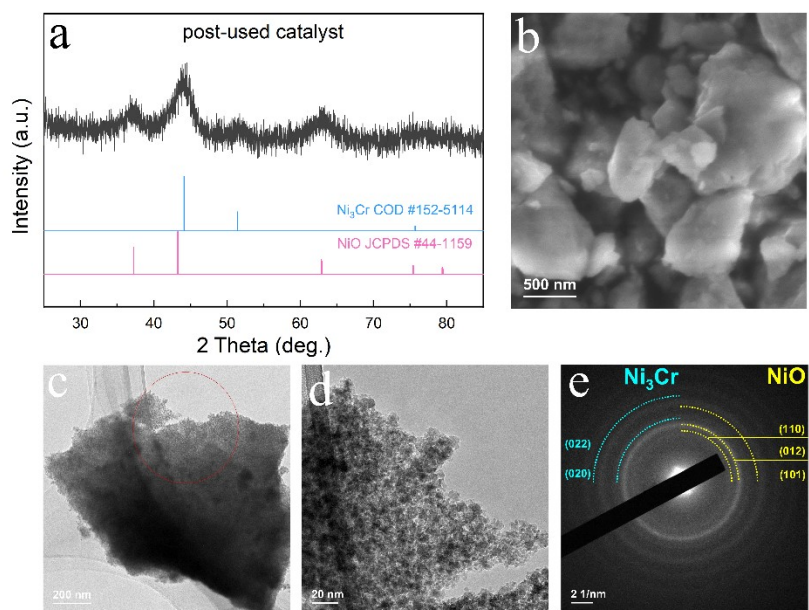

**Figure S8.** Morphology and phase structure characterization results of the post-used  $\text{Ni}_3\text{Cr}/\text{NiO}-\text{CrO}_x$  catalyst: (a) XRD pattern; (b) SEM image; (c-d) TEM images; (e) SAED pattern.

**Table S1.** A comparison of the catalytic performance of non-precious metal catalysts for  $\text{N}_2\text{H}_4 \cdot \text{H}_2\text{O}$  decomposition. Activity attenuation after 10 cyclic usages; <sup>a</sup> 5 cyclic usages; <sup>b</sup> 3 cyclic usages.

| Catalyst                                             | Temperature (°C) | Reaction rate (h <sup>-1</sup> ) | Selectivity (%) | Activity attenuation (%) | Reference |
|------------------------------------------------------|------------------|----------------------------------|-----------------|--------------------------|-----------|
| Ni <sub>10</sub> Mo/Ni-Mo-O                          | 50               | 54.5                             | 97              | <5                       | [1]       |
| Ni <sub>4</sub> W/WO <sub>2</sub> /NiWO <sub>4</sub> | 50               | 33.0                             | 99              | <5                       | [2]       |
| Ni <sub>0.6</sub> Fe <sub>0.4</sub> Mo               | 50               | 28.8                             | 100             | 12 <sup>b</sup>          | [3]       |
| NiCo/NiO-CoO <sub>x</sub>                            | 25               | 5.49                             | 99              | 30                       | [4]       |
| NiFe/MgO                                             | 25               | 13.3                             | 99              | 15 <sup>a</sup>          | [5]       |
| NiMoB-La(OH) <sub>3</sub>                            | 50               | 13.3                             | 100             | 52                       | [6]       |
| Ni-Al <sub>2</sub> O <sub>3</sub> -HT                | 50               | 2.0                              | 93              | 40                       | [7]       |
| 2D NiFe/CeO <sub>2</sub>                             | 50               | 5.73                             | 99              | 35                       | [8]       |
| NiFe/CeZrO <sub>2</sub>                              | 50               | 24.7                             | 100             | 48 <sup>a</sup>          | [9]       |
| Cu@Fe <sub>3</sub> Ni <sub>5</sub>                   | 70               | 35.3                             | 100             | 14 <sup>b</sup>          | [10]      |
| Ni <sub>3</sub> Cr/NiO-CrO <sub>x</sub>              | 50               | 39.8                             | 100             | <4                       | This work |

## References

1. Y. P. Qiu, G. X. Cao, H. Wen, Q. Shi, H. Dai, P. Wang, *Int. J. Hydrogen Energy*, 2019, **44**, 15110–15117.
2. Q. Shi, D. X. Zhang, H. Yin, Y. P. Qiu, L. L. Zhou, C. Chen, H. Wu, P. Wang, *ACS Sustainable Chem. Eng.*, 2020, **8**, 5595–5603.
3. H. L. Wang, J. M. Yan, S. J. Li, X. W. Zhang, Q. Jiang, *J. Mater. Chem. A*, 2015, **3**, 121–124.
4. D. Wu, M. Wen, X. J. Lin, Q. Wu, C. Gu, H. Chen, *J. Mater. Chem. A*, 2016, **4**, 6595–6602.
5. W. Gao, C. Li, H. Chen, M. Wu, S. He, M. We, D. G. Evans, X. Duan, *Green Chem.*, 2014, **16**, 1560–1568.
6. J. Zhang, Q. Kang, Z. Yang, H. Dai, D. Zhuang, P. Wang, *J. Mater. Chem. A*, 2013, **1**, 11623–11628.
7. L. He, Y. Huang, A. Wang, X. Chen, J. J. Delgado, T. Zhang, *Angew. Chem. Int. Ed.*, 2012, **124**, 62950–6298.

8. D. Wu, M. Wen, G. Chen, Q. S. Wang, *ACS Appl. Mater. Interfaces*, 2017, **9**, 16103–16108.
9. H. Zou, Q. Yao, M. Huang, M. Zhu, F. Zhang, Z. H. Lu, *Sustain. Energ. Fuels*, 2019, **3**, 3071–3077.
10. J. Wang, Y. Li, Y. Zhang, *Adv. Funct. Mater.*, 2014, **24**, 7073–7077.
